# Supplementary material for: Emotion-related impulsivity moderates the cognitive interference effect of smartphone availability on working memory
Source: PubMed Central journal article supplement (PMC6898282; doi:10.1038/s41598-019-54911-7), 2019-12-06

# Emotion-related impulsivity moderates the cognitive interference effect of smartphone availability on working memory

Natale Canale<sup>1,\*</sup>, Alessio Vieno<sup>1</sup>, Mattia Doro<sup>1</sup>, Erika Rosa Mineo<sup>1</sup>, Claudia Marino<sup>1</sup> and Joël Billieux<sup>2</sup>

<sup>1</sup> Department of Developmental and Social Psychology, University of Padova, Padova, Italy

<sup>2</sup> Addictive and Compulsive Behaviours Lab, Institute for Health and Behaviour, University of Luxembourg, Esch-sur-Alzette, Luxembourg

\*natale.canale@unipd.it

As indicated by the AIC selection method (table S1), the model with the condition  $\times$  positive urgency  $\times$  setsize interaction term (M5) best fitted the data (Table S1).

| Models | Fixed Effects                                                              | AIC    | Akaike weight |
|--------|----------------------------------------------------------------------------|--------|---------------|
| M0     | ~ 1                                                                        | 619.74 | <.001         |
| M1     | Condition + SPAI+Setsize                                                   | 340.58 | 0.15          |
| M2     | Condition +PU+SPAI+Setsize                                                 | 340.96 | 0.13          |
| M3     | Condition + SPAI+PU*Setsize                                                | 341.88 | 0.08          |
| M4     | PU+Spai+Condition*Setsize                                                  | 343.96 | 0.03          |
| M5     | SPAI+Condition+PU+ PU*Setsize+ Condition*Setsize<br>+ Condition*Setsize*PU | 337.89 | 0.60          |

*PU = positive urgency; Set Sizes = two, three, four squares; SPAI = Smartphone Addiction Inventory*

**Table S1.** The AIC model comparison analysis

With regard to M5 (table S2), there was an interactive effect of condition  $\times$  positive urgency  $\times$  setsize ( $\chi^2(4) = 11.53, p = 0.02$ ).

| Coeffic                           | $\chi^2$ | df | <i>P</i> values |
|-----------------------------------|----------|----|-----------------|
| Condition                         | 4.82     | 2  | .08             |
| Positive Urgency                  | 1.62     | 1  | .20             |
| Spai                              | 0.68     | 1  | .40             |
| SetSize                           | 550.12   | 2  | <.001           |
| Condition X PositiveUrgency       | 6.80     | 2  | .03             |
| Condition X SetSize               | 5.17     | 4  | .26             |
| PositiveUrgency X SetSize         | 3.22     | 2  | .20             |
| ConditionXPositiveUrgencyXSetSize | 11.53    | 4  | .02             |

**Table S2.** M5 model

**Figure S1.** Interaction plot for positive urgency, Set Sizes (2, 3, 4 squares) and condition in relation to visual working memory capacity. Confidence intervals of 95% are presented in blue/pink/green

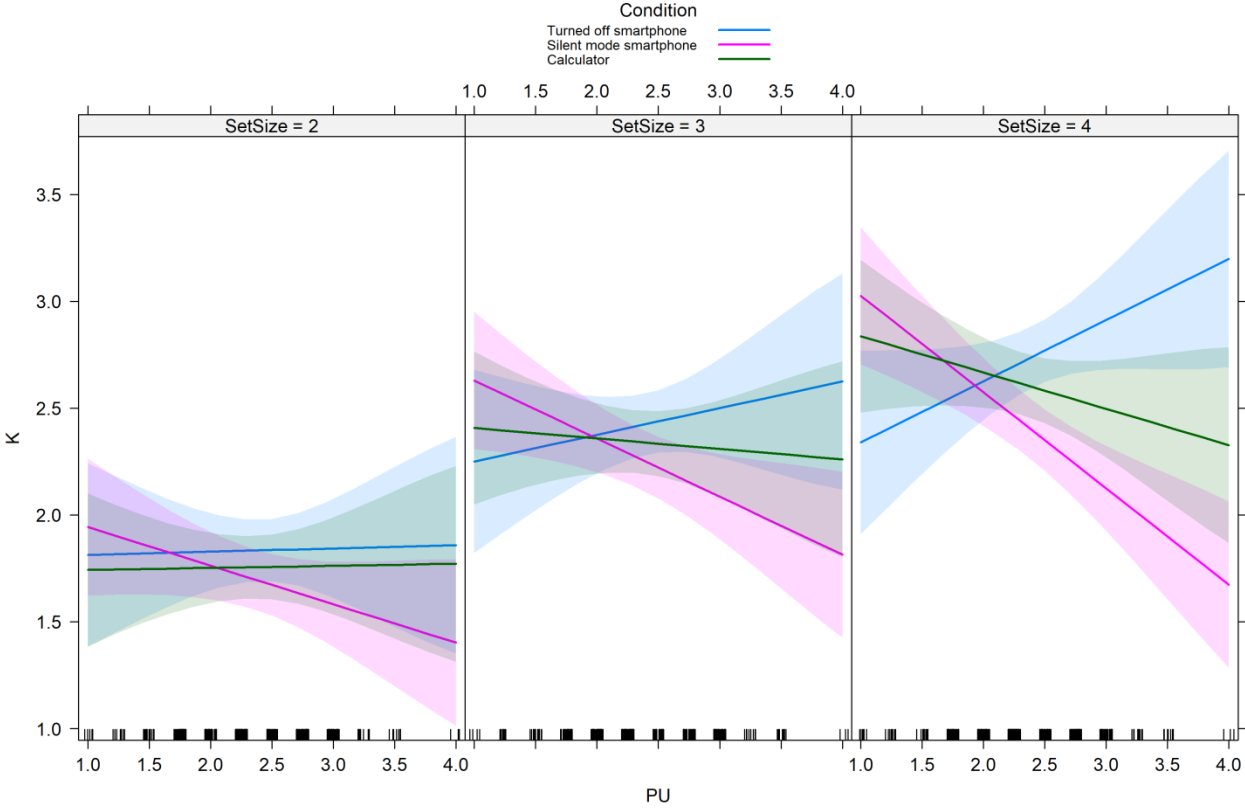

Supplement: 41598_2019_54911_MOESM1_ESM.pdf [file 41598_2019_54911_MOESM1_ESM.pdf]
